# Supplementary material for: Allometric relations and consequences for feeding in small pelagic fish in the Bay of Biscay
Source: Oxford University Press journal article supplement (doi:10.1093/icesjms/fss171), 2012-11-21
Supplement: fss171supp.doc [file fss171supp.doc]

[SUPPLEMENTARY MATERIAL]

[Table legends]

Table A1 Length (average and standard deviation, minimum and maximum) of different prey depending on predators classified according to previously defined predator size ranges (small-medium-large): (a)*E. encrasicolus* (*N* = 85 stomachs), (b) *S. pilchardus* (*N* = 70 stomachs), (c)*T. trachurus* (*N* = 62 stomachs), (d)*T. mediterraneus* (*N* = 13 stomachs), (e)*S. scombrus* (*N* = 92 stomachs), (f)*S. colias* (*N* = 25 stomachs), (g)*B. boops* (*N* = 10 stomachs) and (h)*S. sprattus* (*N* = 20 stomachs). According to copepods, Calanoids *Metridia lucens* and *Pleuromamma* spp*.* are labelled as “Metridinidae fam.”, *Calanus* spp*.* and *Calanoides* spp*.* as “Calanidae fam.”, *Clausocalanus* sp., *Ctenocalanus* sp., *Microcalanus* sp. and *Pseudocalanus* sp*.* as “Clausocalanidae fam.”, and finally, the families Calocalanidae, Paracalanidae, Diaixidae, Eucalanidae and Scolecitrichidae are labelled as “Other Calanoids”. *N* is the number of prey length measurements obtained from stomach contents.

[Figure legends]

Fig. A1. Relative PPSR frequency distribution of abundances of prey consumed by small pelagic predators according to size (i.e., *TL* < 130 mm, *TL* 130-230 mm, *TL* > 230 mm ). Cumulative frequencies are indicated by discontinuous lines. A PPSR value of 800 has been used as the cut-off point in the calculations, which covers ≥99.7% of the accumulated frequency.

[Tables]

Table A1

| **a) *Prey Size (mm) of E. encrasicolus*:** |  | ***TL* < 130 mm** | | | |  | ***TL* 130 - 230 mm** | | | |
| --- | --- | --- | --- | --- | --- | --- | --- | --- | --- | --- |
| **GROUP** |  | ***N*** | ***Avg. (*± *SD)*** | ***Min*** | ***Max*** |  | ***N*** | ***Avg. (*± *SD)*** | ***Min*** | ***Max*** |
| Veliger larvae of Prosobranchia (Gastropoda) |  | *36* | 0.66 (±0.12) | 0.45 | 0.90 |  | *58* | 0.65 (±0.16) | 0.30 | 0.90 |
| Veliger larvae of bivalves |  | *8* | 0.43 (±0.05) | 0.35 | 0.50 |  | *66* | 0.43 (±0.05) | 0.35 | 0.55 |
| Metridinidae fam. (Calanoida ord.) |  | *0* |  |  |  |  | *1* | 2.80 | 2.80 | 2.80 |
| *Acartia* spp*.* (Calanoida ord.) |  | *5* | 1.02 (±0.15) | 0.85 | 1.20 |  | *0* |  |  |  |
| *Candacia armata* (Calanoida ord.) |  | *2* | 1.85 (±0.42) | 1.55 | 2.15 |  | *0* |  |  |  |
| *Centropages typicus* (Calanoida ord.) |  | *35* | 1.66 (±0.13) | 1.35 | 1.90 |  | *4* | 1.64 (±0.05) | 1.60 | 1.70 |
| *Centropages chierchiae* (Calanoida ord.) |  | *12* | 1.67 (±0.12) | 1.40 | 1.85 |  | *0* |  |  |  |
| *Temora longicornis* (Calanoida ord.) |  | *2* | 1.53 (±0.11) | 1.45 | 1.60 |  | *0* |  |  |  |
| *Temora stylifera* (Calanoida ord.) |  | *44* | 1.42 (±0.14) | 1.00 | 1.75 |  | *77* | 1.40 (±0.15) | 0.95 | 1.75 |
| Calanidae fam. (Calanoida ord.) |  | *2* | 3.12 (±0.11) | 3.10 | 3.25 |  | *8* | 2.71 (±0.26) | 2.20 | 3.05 |
| Unidentifyable Small Calanoids (Calanoida ord.) |  | *17* | 0.95 (±0.25) | 0.55 | 1.30 |  | *6* | 1.18 (±0.11) | 1.05 | 1.35 |
| Other Calanoids (Calanoida ord.) |  | *1* | 1.60 | 1.60 | 1.60 |  | *0* |  |  |  |
| *Oithona* spp*.* (Cyclopoida ord.) |  | *2* | 0.63 (±0.04) | 0.60 | 0.65 |  | *0* |  |  |  |
| *Oncaea* spp.(Cyclopoida ord.) |  | *190* | 0.42 (±0.09) | 0.30 | 0.70 |  | *42* | 0.56 (±0.08) | 0.45 | 0.80 |
| *Corycaeus anglicus* (Cyclopoida ord.) |  | *40* | 0.88 (±0.09) | 0.55 | 1.10 |  | *47* | 0.90 (±0.09) | 0.70 | 1.05 |
| *Euterpina acutifrons* (Harpacticoida ord.) |  | *85* | 0.54 (±0.14) | 0.30 | 1.00 |  | *0* |  |  |  |
| *Microsetella* spp*.* (Harpacticoida ord.) |  | *109* | 0.65 (±0.38) | 0.35 | 2.30 |  | *6* | 1.92 (±0.35) | 1.30 | 2.25 |
| Parasitic *Caligoida* sp*.* (Harpacticoida ord.) |  | *1* | 3.55 | 3.55 | 3.55 |  | *0* |  |  |  |
| Copepoda naupli |  | *43* | 0.31 (±0.05) | 0.20 | 0.40 |  | *3* | 0.33 (±0.03) | 0.30 | 0.35 |
| Juvenile copepods |  | *32* | 0.42 (±0.13) | 0.30 | 0.90 |  | *34* | 0.47 (±0.17) | 0.30 | 1.05 |
| Cirripedia naupli |  | *1* | 0.60 | 0.60 | 0.60 |  | *0* |  |  |  |
| Euphausiacea ord. (adult) |  | *2* | 1.65 (±0.14) | 1.55 | 1.75 |  | *0* |  |  |  |
| Decapoda ord. ZOEA larval phase |  | *2* | 1.63 (±0.60) | 1.20 | 2.05 |  | *0* |  |  |  |
| Decapoda ord. megalopa larval phase |  | *2* | 4.05 (±0.35) | 3.80 | 4.30 |  | *2* | 1.93 (±0.04) | 1.90 | 1.95 |
| *Muggiaea* sp*.* (Siphonophora) |  | *2* | 5.55 (±1.20) | 4.70 | 6.40 |  | *0* |  |  |  |
| *Sagitta setosa* (Chaetognatha) |  | *0* |  |  |  |  | *1* | 2.90 | 2.90 | 2.90 |
| Undefined eggs (crustacean eggs, fish eggs…) |  | *65* | 0.33 (±0.05) | 0.25 | 0.50 |  | *30* | 0.34 (±0.07) | 0.25 | 0.45 |

| **b) *Prey Size (mm) of S. pilchardus*:** |  | ***TL* < 130 mm** | | | |  | ***TL* 130 - 230 mm** | | | |  | ***TL* >230 mm** | | | |
| --- | --- | --- | --- | --- | --- | --- | --- | --- | --- | --- | --- | --- | --- | --- | --- |
| **GROUP** |  | ***N*** | ***Avg. (*± *SD)*** | ***Min*** | ***Max*** |  | ***N*** | ***Avg. (*± *SD)*** | ***Min*** | ***Max*** |  | ***N*** | ***Avg. (*± *SD)*** | ***Min*** | ***Max*** |
| Veliger larvae of Prosobranchia (Gastropoda) |  | *1* | 0.45 | 0.45 | 0.45 |  | *16* | 0.55 (±0.09) | 0.45 | 0.70 |  | *2* | 0.63 (±0.04) | 0.60 | 0.65 |
| Veliger larvae of bivalves |  | *0* | 0.50 | 0.50 | 0.50 |  | *12* | 0.41 (±0.06) | 0.30 | 0.50 |  | *0* |  |  |  |
| *Acartia* spp*.* (Calanoida ord.) |  | *0* |  |  |  |  | *39* | 1.12 (±0.2) | 0.80 | 1.55 |  | *2* | 1.03 (±0.11) | 0.95 | 1.10 |
| *Candacia armata* (Calanoida ord.) |  | *0* |  |  |  |  | *11* | 2.46 (±0.64) | 1.65 | 3.30 |  | *1* | 3.35 | 3.35 | 3.35 |
| *Centropages* spp*.* (Calanoida ord.) |  | *0* |  |  |  |  | *61* | 1.89 (±0.19) | 1.55 | 2.70 |  | *20* | 1.99 (±0.25) | 1.60 | 2.75 |
| *Centropages typicus* (Calanoida ord.) |  | *1* | 1.60 | 1.60 | 1.60 |  | *26* | 1.49 (±0.15) | 1.30 | 1.80 |  | *0* |  |  |  |
| *Centropages chierchiae* (Calanoida ord.) |  | *0* |  |  |  |  | *5* | 1.59 (±0.08) | 1.45 | 1.65 |  | *0* |  |  |  |
| *Temora longicornis* (Calanoida ord.) |  | *0* |  |  |  |  | *216* | 1.29 (±0.11) | 1.00 | 1.55 |  | *41* | 1.31 (±0.13) | 1.10 | 1.60 |
| *Temora stylifera* (Calanoida ord.) |  | *22* | 1.41 (±0.10) | 1.10 | 1.55 |  | *260* | 1.43 (±0.12) | 0.95 | 1.65 |  | *0* |  |  |  |
| *Euchaeta* sp*.* (Calanoida ord.) |  | *0* |  |  |  |  | *1* | 2.60 | 2.60 | 2.60 |  | *0* |  |  |  |
| Calanidae fam. (Calanoida ord.) |  | *0* |  |  |  |  | *68* | 2.82 (±0.33) | 2.00 | 3.65 |  | *4* | 2.86 (±0.20) | 2.70 | 3.15 |
| Unidentifyable Small Calanoids (Calanoida ord.) |  | *1* | 1.15 | 1.15 | 1.15 |  | *92* | 1.06 (±0.20) | 0.55 | 1.50 |  | *9* | 1.03 (±0.19) | 0.70 | 1.30 |
| Other Calanoids (Calanoida ord.) |  | *0* |  |  |  |  | *1* | 2.35 | 2.35 | 2.35 |  | *0* |  |  |  |
| *Oithona* spp*.* (Cyclopoida ord.) |  | *0* |  |  |  |  | *1* | 0.60 | 0.60 | 0.60 |  | *0* |  |  |  |
| *Oncaea* spp*.* (Cyclopoida ord.) |  | *7* | 0.53 (±0.06) | 0.45 | 0.65 |  | *446* | 0.55 (±0.06) | 0.35 | 0.75 |  | *24* | 0.55 (±0.06) | 0.45 | 0.65 |
| *Corycaeus anglicus* (Cyclopoida ord.) |  | *7* | 0.90 (±0.08) | 0.80 | 1.05 |  | *166* | 0.92 (±0.10) | 0.65 | 1.30 |  | *8* | 0.97 (±0.07) | 0.85 | 1.05 |
| *Euterpina acutifrons* (Harpacticoida ord.) |  | *0* |  |  |  |  | *82* | 0.70 (±0.12) | 0.55 | 1.30 |  | *20* | 0.63 (±0.07) | 0.50 | 0.75 |
| *Microsetella* spp.(Harpacticoida ord.) |  | *0* |  |  |  |  | *5* | 1.61 (±0.67) | 0.70 | 2.15 |  | *0* |  |  |  |
| Copepoda naupli |  | *0* |  |  |  |  | *12* | 0.33 (±0.05) | 0.20 | 0.40 |  | *2* | 0.30 | 0.30 | 0.30 |
| Juvenile copepods |  | *19* | 0.43 (±0.11) | 0.35 | 0.75 |  | *283* | 0.40 (±0.08) | 0.25 | 0.75 |  | *8* | 0.44 (±0.08) | 0.35 | 0.55 |
| Cirripedia naupli |  | *0* |  |  |  |  | *33* | 0.58 (±0.12) | 0.35 | 0.90 |  | *1* | 0.50 | 0.50 | 0.50 |
| Cirripedia (cipris larvae) |  | *0* |  |  |  |  | *231* | 0.58 (±0.06) | 0.45 | 0.80 |  | *35* | 0.57 (±0.07) | 0.50 | 0.80 |
| *Facetotecta* larvae |  | *0* |  |  |  |  | *1* | 0.80 | 0.80 | 0.80 |  | *0* |  |  |  |
| Euphausiacea ord. furcilia larval phase |  | *0* |  |  |  |  | *10* | 3.24 (±1.04) | 1.70 | 4.90 |  | *0* |  |  |  |
| Euphausiacea ord. (adult) |  | *0* |  |  |  |  | *0* |  |  |  |  | *2* | 10.10 (±0.93) | 9.44 | 10.75 |
| Decapoda ord. ZOEA larval phase |  | *0* |  |  |  |  | *19* | 2.37 (±0.93) | 0.85 | 4.15 |  | *24* | 3.49 (±1.42) | 1.75 | 7.60 |
| Decapoda ord. megalopa larval phase |  | *0* |  |  |  |  | *8* | 2.44 (±1.07) | 1.40 | 4.80 |  | *9* | 4.03 (±0.81) | 3.15 | 5.80 |
| Decapoda ord. (adult) |  | *0* |  |  |  |  | *5* | 5.52 (±3.29) | 3.45 | 11.20 |  | *1* | 4.15 | 4.15 | 4.15 |
| Anchovy eggs (*Engraulis encrasicolus*) |  | *0* |  |  |  |  | *158* | 1.44 (±0.09) | 1.05 | 1.70 |  | *1* | 1.30 | 1.30 | 1.30 |
| Undefined fish eggs |  | *0* |  |  |  |  | *138* | 0.99 (±0.13) | 0.75 | 1.40 |  | *18* | 0.99 (±0.26) | 0.70 | 1.50 |
| Undefined eggs (crustacean eggs, fish eggs…) |  | *2* | 0.43 (±0.11) | 0.35 | 0.50 |  | *123* | 0.46 (±0.16) | 0.20 | 0.80 |  | *1* | 0.50 | 0.50 | 0.50 |

| **c) *Prey Size (mm)* of *T. trachurus*:** |  | ***TL* < 130 mm** | | | |  | ***TL* 130 - 230 mm** | | | |  | ***TL* > 230 mm** | | | |
| --- | --- | --- | --- | --- | --- | --- | --- | --- | --- | --- | --- | --- | --- | --- | --- |
| **GROUP** |  | ***N*** | ***Avg. (*± *SD)*** | ***Min*** | ***Max*** |  | ***N*** | ***Avg. (*± *SD)*** | ***Min*** | ***Max*** |  | ***N*** | ***Avg. (*± *SD)*** | ***Min*** | ***Max*** |
| Veliger larvae of Prosobranchia (Gastropoda) |  | *15* | 0.6 (±0.07) | 0.50 | 0.70 |  | *13* | 0.63 (±0.10) | 0.50 | 0.85 |  | *4* | 0.93 (±0.10) | 0.80 | 1.05 |
| *Podon* sp*.* (Cladocera subord.) |  | *1* | 0.90 | 0.90 | 0.90 |  | *0* |  |  |  |  | *0* |  |  |  |
| *Evadne* sp*.* (Cladocera subord.) |  | *0* |  |  |  |  | *1* | 0.65 | 0.65 | 0.65 |  | *0* |  |  |  |
| Metridinidae fam. (Calanoida ord.) |  | *0* |  |  |  |  | *0* |  |  |  |  | *1* | 3.65 | 3.65 | 3.65 |
| *Acartia* spp*.* (Calanoida ord.) |  | *0* |  |  |  |  | *10* | 1.11 (±0.07) | 1.00 | 1.20 |  | *0* |  |  |  |
| *Candacia armata* (Calanoida ord.) |  | *3* | 2.62 (±0.24) | 2.35 | 2.80 |  | *64* | 2.56 (±0.41) | 1.55 | 3.55 |  | *24* | 2.86 (±0.22) | 2.25 | 3.20 |
| *Centropages* spp*.* (Calanoida ord.) |  | *0* |  |  |  |  | *30* | 1.83 (±0.14) | 1.60 | 2.10 |  | *30* | 1.79 (±0.17) | 1.45 | 2.15 |
| *Centropages typicus* (Calanoida ord.) |  | *0* |  |  |  |  | *1* | 1.65 | 1.65 | 1.65 |  | *0* |  |  |  |
| *Temora longicornis* (Calanoida ord.) |  | *86* | 1.37 (±0.14) | 1.10 | 1.80 |  | *35* | 1.38 (±0.13) | 1.10 | 1.60 |  | *0* |  |  |  |
| *Temora stylifera* (Calanoida ord.) |  | *65* | 1.44 (±0.11) | 1.20 | 1.65 |  | *172* | 1.46 (±0.10) | 1.20 | 1.70 |  | *0* |  |  |  |
| *Euchaeta* sp*.* (Calanoida ord.) |  | *4* | 3.33 (±0.19) | 3.15 | 3.60 |  | *42* | 3.12 (±0.40) | 2.15 | 3.70 |  | *3* | 3.58 (±0.20) | 3.40 | 3.80 |
| Calanidae fam. (Calanoida ord.) |  | *6* | 2.68 (±0.19) | 2.30 | 2.80 |  | *31* | 2.60 (±0.47) | 1.80 | 3.55 |  | *15* | 2.71 (±0.22) | 2.30 | 3.00 |
| Clausocalanidae fam. (Calanoida ord.) |  | *0* |  |  |  |  | *3* | 3.10 (±0.39) | 2.85 | 3.55 |  | *0* |  |  |  |
| Unidentifyable Small Calanoids (Calanoida ord.) |  | *9* | 1.09 (±0.12) | 0.85 | 1.30 |  | *90* | 1.23 (±0.14) | 0.90 | 1.70 |  | *2* | 1.65 (±0.07) | 1.60 | 1.70 |
| Other Calanoids (Calanoida ord.) |  | *0* |  |  |  |  | *17* | 2.39 (±0.47) | 1.30 | 3.25 |  | *0* |  |  |  |
| *Oncaea* spp*.* (Cyclopoida ord.) |  | *5* | 0.58 (±0.07) | 0.55 | 0.70 |  | *2* | 0.55 (±0.07) | 0.50 | 0.60 |  | *0* |  |  |  |
| *Corycaeus anglicus* (Cyclopoida ord.) |  | *29* | 0.95 (±0.08) | 0.85 | 1.10 |  | *20* | 0.98 (±0.07) | 0.85 | 1.10 |  | *0* |  |  |  |
| *Euterpina acutifrons* (Harpacticoida ord.) |  | *2* | 0.83 (±0.04) | 0.80 | 0.85 |  | *3* | 0.65 (±0.05) | 0.60 | 0.70 |  | *0* |  |  |  |
| *Clytemnestra* spp*.* (Harpacticoida ord.) |  | *0* |  |  |  |  | *0* |  |  |  |  | *2* | 1.18 (±0.04) | 1.15 | 1.20 |
| Juvenile copepods |  | *18* | 0.50 (±0.14) | 0.35 | 0.85 |  | *10* | 0.66 (±0.23) | 0.35 | 0.90 |  | *0* |  |  |  |
| Cirripedia (cipris larvae) |  | *2* | 0.73 (±0.11) | 0.65 | 0.80 |  | *0* |  |  |  |  | *0* |  |  |  |
| Mysida ord. |  | *0* |  |  |  |  | *2* | 3.53 (±0.25) | 3.35 | 3.70 |  | *10* | 8.98 (±1.75) | 6.80 | 13.30 |
| Amphipoda ord. |  | *1* | 9.60 | 9.60 | 9.60 |  | *0* |  |  |  |  | *0* |  |  |  |
| Euphausiacea ord. calyptopis larval phase |  | *0* |  |  |  |  | *1* | 1.80 | 1.80 | 1.80 |  | *1* | 1.20 | 1.20 | 1.20 |
| Euphausiacea ord. furcilia larval phase |  | *3* | 5.13 (±1.27) | 3.70 | 6.10 |  | *104* | 4.42 (±1.06) | 1.95 | 8.30 |  | *58* | 5.05 (±1.31) | 2.70 | 8.40 |
| Euphausiacea ord. (adult) |  | *2* | 13.34 (±11.23) | 5.40 | 21.28 |  | *7* | 7.27 (±2.83) | 2.90 | 11.30 |  | *20* | 9.30 (±2.14) | 6.20 | 13.38 |
| Decapoda ord. ZOEA larval phase |  | *7* | 3.62 (±1.38) | 1.95 | 5.80 |  | *8* | 2.66 (±1.03) | 1.15 | 3.90 |  | *2* | 2.25 (±1.34) | 1.30 | 3.20 |
| Decapoda ord. megalopa larval phase |  | *4* | 3.5 (±0.58) | 2.65 | 3.90 |  | *15* | 3.08 (±0.81) | 2.00 | 4.20 |  | *62* | 3.47 (±0.77) | 2.05 | 5.90 |
| Decapoda ord. late larval phase |  | *0* |  |  |  |  | *11* | 3.30 (±0.43) | 2.60 | 3.90 |  | *1* | 4.80 | 4.80 | 4.80 |
| Decapoda ord. (adult) |  | *0* |  |  |  |  | *4* | 8.90 (±1.61) | 7.70 | 11.20 |  | *37* | 9.08 (±3.61) | 3.10 | 17.90 |
| Anchovy eggs (*Engraulis encrasicolus*) |  | *0* |  |  |  |  | *1* | 1.45 | 1.45 | 1.45 |  | *0* |  |  |  |
| Undefined fish eggs |  | *0* |  |  |  |  | *3* | 1.05 (±0.05) | 1.00 | 1.10 |  | *2* | 0.85 (±0.14) | 0.75 | 0.95 |
| Undefined fish larvae |  | *2* | 10.25 (±3.46) | 7.80 | 12.70 |  | *1* | 12.40 | 12.40 | 12.40 |  | *25* | 13.50 (±4.78) | 5.80 | 23.60 |
| Undefined eggs (crustacean eggs, fish eggs…) |  | *0* |  |  |  |  | *11* | 0.34 (±0.03) | 0.30 | 0.40 |  | *6* | 0.78 (±0.24) | 0.45 | 1.00 |
| Others |  | *17* | 0.50 (±0.12) | 0.35 | 0.80 |  | *1* | 0.55 | 0.55 | 0.55 |  | *4* | 2.6 (±0.56) | 1.85 | 3.20 |

| **d) *Prey Size (mm) of T. mediterraneus*:** |  | ***TL* < 130 mm** | | | |  | ***TL* > 230 mm** | | | |
| --- | --- | --- | --- | --- | --- | --- | --- | --- | --- | --- |
| **GROUP** |  | ***N*** | ***Avg. (*± *SD)*** | ***Min*** | ***Max*** |  | ***N*** | ***Avg. (*± *SD)*** | ***Min*** | ***Max*** |
| Veliger larvae of Prosobranchia (Gastropoda) |  | *0* |  |  |  |  | *3* | 0.62 (±0.03) | 0.60 | 0.65 |
| *Acartia* spp*.* (Calanoida ord.) |  | *5* | 1.24 (±0.09) | 1.15 | 1.35 |  | *0* |  |  |  |
| *Candacia armata* (Calanoida ord.) |  | *7* | 2.03 (±0.45) | 1.50 | 2.95 |  | *0* |  |  |  |
| *Centropages typicus* (Calanoida ord.) |  | *119* | 1.65 (±0.12) | 1.30 | 2.00 |  | *1* | 1.80 | 1.80 | 1.80 |
| *Centropages chierchiae* (Calanoida ord.) |  | *93* | 1.75 (±0.11) | 1.45 | 1.95 |  | *0* |  |  |  |
| *Temora longicornis* (Calanoida ord.) |  | *1* | 1.20 | 1.20 | 1.20 |  | *0* |  |  |  |
| *Temora stylifera* (Calanoida ord.) |  | *44* | 1.62 (±0.13) | 1.35 | 2.15 |  | *23* | 1.45 (±0.11) | 1.20 | 1.60 |
| Calanidae fam. (Calanoida ord.) |  | *2* | 2.80 (±0.71) | 2.30 | 3.30 |  | *0* |  |  |  |
| Unidentifyable Small Calanoids (Calanoida ord.) |  | *191* | 1.35 (±0.14) | 0.80 | 1.65 |  | *0* |  |  |  |
| *Oncaea* spp*.* (Cyclopoida ord.) |  | *2* | 0.53 (±0.04) | 0.50 | 0.55 |  | *1* | 0.60 | 0.60 | 0.60 |
| *Corycaeus anglicus* (Cyclopoida ord.) |  | *5* | 0.89 (±0.10) | 0.80 | 1.05 |  | *6* | 0.93 (±0.05) | 0.85 | 1.00 |
| Amphipoda ord. |  | *1* | 7.70 | 7.70 | 7.70 |  | *0* |  |  |  |
| Euphausiacea ord. calyptopis larval phase |  | *1* | 0.90 | 0.90 | 0.90 |  | *0* |  |  |  |
| Euphausiacea ord. furcilia larval phase |  | *1* | 5.90 | 5.90 | 5.90 |  | *0* |  |  |  |
| Euphausiacea ord. (adult) |  | *4* | 28.31 (±2.40) | 25.23 | 31.00 |  | *0* |  |  |  |

| **e) *Prey Size (mm)* of *S. scombrus*:** |  | ***TL* < 130 mm** | | | |  | ***TL* 130 - 230 mm** | | | |  | ***TL* > 230 mm** | | | |
| --- | --- | --- | --- | --- | --- | --- | --- | --- | --- | --- | --- | --- | --- | --- | --- |
| **GROUP** |  | ***N*** | ***Avg. (*± *SD)*** | ***Min*** | ***Max*** |  | ***N*** | ***Avg. (*± *SD)*** | ***Min*** | ***Max*** |  | ***N*** | ***Avg. (*± *SD)*** | ***Min*** | ***Max*** |
| Veliger larvae of Prosobranchia (Gastropoda) |  | *0* |  |  |  |  | *1* | 0.65 | 0.65 | 0.65 |  | *12* | 0.58 (±0.24) | 0.30 | 1.00 |
| Veliger larvae of bivalves |  | *0* |  |  |  |  | *0* |  |  |  |  | *3* | 0.30 (±0.10) | 0.20 | 0.40 |
| *Podon* sp*.* (Cladocera subord.) |  | *0* |  |  |  |  | *0* |  |  |  |  | *3* | 1.13 (±0.28) | 0.90 | 1.45 |
| *Evadne* sp*.* (Cladocera subord.) |  | *0* |  |  |  |  | *0* |  |  |  |  | *5* | 0.74 (±0.09) | 0.60 | 0.80 |
| *Acartia* spp*.* (Calanoida ord.) |  | *0* |  |  |  |  | *8* | 1.07 (±0.12) | 0.95 | 1.30 |  | *33* | 1.38 (±0.46) | 0.85 | 2.80 |
| *Candacia armata* (Calanoida ord.) |  | *0* |  |  |  |  | *1* | 2.05 | 2.05 | 2.05 |  | *13* | 2.78 (±0.40) | 1.85 | 3.15 |
| *Centropages* spp*.* (Calanoida ord.) |  | *6* | 1.81 (±0.07) | 1.70 | 1.90 |  | *19* | 1.85 (±0.13) | 1.70 | 2.10 |  | *178* | 1.92 (±0.19) | 1.35 | 2.60 |
| *Centropages typicus* (Calanoida ord.) |  | *0* |  |  |  |  | *5* | 1.72 (±0.16) | 1.45 | 1.85 |  | *1* | 1.45 | 1.45 | 1.45 |
| *Centropages chierchiae* (Calanoida ord.) |  | *3* | 1.98 (±0.03) | 1.95 | 2.00 |  | *5* | 1.75 (±0.08) | 1.65 | 1.85 |  | *2* | 1.98 (±0.11) | 1.90 | 2.05 |
| *Isias clavipes* (Calanoida ord.) |  | *0* |  |  |  |  | *0* |  |  |  |  | *1* | 2.00 | 2.00 | 2.00 |
| *Temora longicornis* (Calanoida ord.) |  | *0* |  |  |  |  | *23* | 1.43 (±0.15) | 0.95 | 1.60 |  | *358* | 1.37 (±0.15) | 0.90 | 2.05 |
| *Temora stylifera* (Calanoida ord.) |  | *0* |  |  |  |  | *68* | 1.41 (±0.19) | 0.90 | 1.90 |  | *62* | 1.49 (±0.11) | 1.20 | 1.65 |
| *Euchaeta* sp.(Calanoida ord.) |  | *0* |  |  |  |  | *1* | 2.45 | 2.45 | 2.45 |  | *45* | 3.67 (±0.30) | 2.55 | 4.40 |
| Calanidae fam. (Calanoida ord.) |  | *1* | 3.35 | 3.35 | 3.35 |  | *4* | 3.01 (±0.25) | 2.70 | 3.30 |  | *256* | 2.97 (±0.49) | 1.40 | 3.95 |
| *Subeucalanus* sp.(Calanoida ord.) |  | *0* |  |  |  |  | *2* | 2.58 (±0.04) | 2.55 | 2.60 |  | *0* |  |  |  |
| Clausocalanidae fam. (Calanoida ord.) |  | *0* |  |  |  |  | *0* |  |  |  |  | *2* | 1.35 (±0.21) | 1.20 | 1.50 |
| Unidentifyable Small Calanoids (Calanoida ord.) |  | *0* |  |  |  |  | *20* | 1.05 (±0.18) | 0.70 | 1.40 |  | *102* | 1.08 (±0.17) | 0.60 | 1.45 |
| Other Calanoids (Calanoida ord.) |  | *0* |  |  |  |  | *1* | 1.60 | 1.60 | 1.60 |  | *7* | 2.12 (±0.93) | 1.05 | 3.20 |
| *Oithona* spp*.* (Cyclopoida ord.) |  | *0* |  |  |  |  | *0* |  |  |  |  | *5* | 0.79 (±0.02) | 0.75 | 0.80 |
| *Oncaea* spp*.* (Cyclopoida ord.) |  | *0* |  |  |  |  | *37* | 0.57 (±0.05) | 0.50 | 0.70 |  | *75* | 0.58 (±0.06) | 0.45 | 0.70 |
| *Corycaeus anglicus* (Cyclopoida ord.) |  | *0* |  |  |  |  | *9* | 0.90 (±0.11) | 0.75 | 1.05 |  | *48* | 0.99 (±0.07) | 0.85 | 1.10 |
| *Euterpina acutifrons* (Harpacticoida ord.) |  | *0* |  |  |  |  | *4* | 0.65 | 0.65 | 0.65 |  | *36* | 0.71 (±0.08) | 0.55 | 0.85 |
| *Thalestris* sp*.* (Harpacticoida ord.) |  | *0* |  |  |  |  | *0* |  |  |  |  | *1* | 3.50 | 3.50 | 3.50 |
| Parasitic *Caligoida* sp*.* (Harpacticoida ord.) |  | *0* |  |  |  |  | *0* |  |  |  |  | *1* | 4.95 | 4.95 | 4.95 |
| Copepoda naupli |  | *0* |  |  |  |  | *0* |  |  |  |  | *1* | 0.40 | 0.40 | 0.40 |
| Juvenile copepods |  | *0* |  |  |  |  | *23* | 0.47 (±0.18) | 0.30 | 0.95 |  | *42* | 0.59 (±0.19) | 0.30 | 1.10 |
| Cirripedia naupli |  | *0* |  |  |  |  | *0* |  |  |  |  | *62* | 0.64 (±0.11) | 0.35 | 0.85 |
| Cirripedia (cipris larvae) |  | *0* |  |  |  |  | *0* |  |  |  |  | *34* | 0.63 (±0.09) | 0.45 | 0.85 |
| Mysida ord. |  | *0* |  |  |  |  | *0* |  |  |  |  | *5* | 7.72 (±0.78) | 6.50 | 8.40 |
| Stomatopoda ord. |  | *0* |  |  |  |  | *1* | 9.20 | 9.20 | 9.20 |  | *0* |  |  |  |
| Amphipoda ord. |  | *0* |  |  |  |  | *0* |  |  |  |  | *1* | 12.50 | 12.50 | 12.50 |
| Euphausiacea ord. meta-naupli |  | *0* |  |  |  |  | *1* | 0.95 | 0.95 | 0.95 |  | *24* | 0.71 (±0.09) | 0.60 | 0.95 |
| Euphausiacea ord. calyptopis larval phase |  | *0* |  |  |  |  | *0* |  |  |  |  | *204* | 1.56 (±0.34) | 0.95 | 2.45 |
| Euphausiacea ord. furcilia larval phase |  | *0* |  |  |  |  | *0* |  |  |  |  | *173* | 3.97 (±1.56) | 1.80 | 10.10 |

(Table A1 [e] continued)

| Euphausiacea ord. (adult) |  | *6* | 25.81 (±7.93) | 10.30 | 33.12 |  | *13* | 28.43 (±7.61) | 6.40 | 35.75 |  | *127* | 8.93 (±5.62) | 2.50 | 43.00 |
| --- | --- | --- | --- | --- | --- | --- | --- | --- | --- | --- | --- | --- | --- | --- | --- |
| Decapoda ord. ZOEA larval phase |  | *0* |  |  |  |  | *3* | 2.42 (±1.71) | 1.10 | 4.35 |  | *137* | 3.43 (±1.59) | 0.85 | 8.70 |
| Decapoda ord. megalopa larval phase |  | *0* |  |  |  |  | *0* |  |  |  |  | *28* | 3.57 (±1.33) | 1.90 | 7.40 |
| Decapoda ord. late larval phase |  | *0* |  |  |  |  | *3* | 2.55 (±0.09) | 2.45 | 2.60 |  | *3* | 2.57 (±1.03) | 1.60 | 3.65 |
| Decapoda ord. (adult) |  | *0* |  |  |  |  | *1* | 3.65 | 3.65 | 3.65 |  | *6* | 10.82 (±14.12) | 0.70 | 37.00 |
| *Muggiaea* sp*.* (Siphonophora) |  | *0* |  |  |  |  | *1* | 111.00 | 111.00 | 111.00 |  | *1* | 0.85 | 0.85 | 0.85 |
| Salps |  | *0* |  |  |  |  | *4* | 14.63 (±7.05) | 8.00 | 24.10 |  | *43* | 15.86 (±5.29) | 8.30 | 29.80 |
| Anchovy eggs (*Engraulis encrasicolus*) |  | *0* |  |  |  |  | *0* |  |  |  |  | *41* | 1.44 (±0.15) | 1.00 | 1.85 |
| Undefined fish eggs |  | *0* |  |  |  |  | *10* | 1.19 (±0.21) | 0.85 | 1.45 |  | *74* | 0.95 (±0.16) | 0.65 | 1.70 |
| Undefined fish larvae |  | *0* |  |  |  |  | *0* |  |  |  |  | *2* | 18.05 (±7.71) | 12.60 | 23.50 |
| Undefined fish |  | *0* |  |  |  |  | *2* | 52.50 (±20.51) | 38.00 | 67.00 |  | *15* | 81.69 (±27.68) | 5.35 | 131.00 |
| Undefined eggs (crustacean eggs, fish eggs…) |  | *0* |  |  |  |  | *5* | 0.38 (±0.18) | 0.25 | 0.60 |  | *10* | 0.47 (±0.18) | 0.25 | 0.70 |

| **f) *Prey Size (mm)* of *S. colias*:** |  | ***TL* 130 - 230 mm** | | | |  | ***TL* > 230 mm** | | | |
| --- | --- | --- | --- | --- | --- | --- | --- | --- | --- | --- |
| **GROUP** |  | ***N*** | ***Avg. (± SD)*** | ***Min*** | ***Max*** |  | ***N*** | ***Avg. (± SD)*** | ***Min*** | ***Max*** |
| Veliger larvae of Prosobranchia (Gastropoda) |  | *4* | 0.69 (±0.17) | 0.50 | 0.85 |  | *0* |  |  |  |
| *Acartia* spp.(Calanoida ord.) |  | *5* | 1.10 (±0.09) | 0.95 | 1.20 |  | *5* | 1.09 (±0.10) | 0.95 | 1.20 |
| *Candacia armata* (Calanoida ord.) |  | *9* | 2.62 (±0.37) | 2.20 | 3.35 |  | *1* | 2.35 | 2.35 | 2.35 |
| *Centropages* spp*.* (Calanoida ord.) |  | *0* |  |  |  |  | *4* | 2.33 (±0.38) | 1.80 | 2.70 |
| *Centropages typicus* (Calanoida ord.) |  | *5* | 1.68 (±0.06) | 1.60 | 1.75 |  | *2* | 1.80 (±0.07) | 1.75 | 1.85 |
| *Centropages chierchiae* (Calanoida ord.) |  | *5* | 1.81 (±0.07) | 1.70 | 1.90 |  | *1* | 1.85 | 1.85 | 1.85 |
| *Temora longicornis* (Calanoida ord.) |  | *0* |  |  |  |  | *2* | 1.25 (±0.21) | 1.10 | 1.40 |
| *Temora stylifera* (Calanoida ord.) |  | *126* | 1.48 (±0.12) | 0.90 | 1.65 |  | *66* | 1.52 (±0.1) | 1.25 | 1.70 |
| *Eurytemora* spp*.* (Calanoida ord.) |  | *0* |  |  |  |  | *2* | 1.83 (±0.39) | 1.55 | 2.10 |
| *Euchaeta* sp*.* (Calanoida ord.) |  | *3* | 3.28 (±0.16) | 3.10 | 3.40 |  | *0* |  |  |  |
| Calanidae fam. (Calanoida ord.) |  | *1* | 2.30 | 2.30 | 2.30 |  | *2* | 2.58 (±0.04) | 2.55 | 2.60 |
| Unidentifyable Small Calanoids (Calanoida ord.) |  | *25* | 1.16 (±0.12) | 0.85 | 1.35 |  | *11* | 1.09 (±0.19) | 0.80 | 1.30 |
| Other Calanoids (Calanoida ord.) |  | *2* | 2.15 (±0.78) | 1.60 | 2.70 |  | *0* |  |  |  |
| *Oncaea* spp.(Cyclopoida ord.) |  | *17* | 0.56 (±0.03) | 0.50 | 0.60 |  | *12* | 0.54 (±0.04) | 0.50 | 0.60 |
| *Corycaeus anglicus* (Cyclopoida ord.) |  | *13* | 0.89 (±0.06) | 0.80 | 1.00 |  | *3* | 1.02 (±0.06) | 0.95 | 1.05 |
| *Euterpina acutifrons* (Harpacticoida ord.) |  | *2* | 1.00 (±0.28) | 0.80 | 1.20 |  | *0* |  |  |  |
| Parasitic *Caligoida* sp*.* (Harpacticoida ord.) |  | *0* |  |  |  |  | *1* | 2.65 | 2.65 | 2.65 |
| Juvenile copepods |  | *31* | 0.56 (±0.18) | 0.35 | 0.95 |  | *22* | 0.61 (±0.22) | 0.35 | 1.10 |
| Mysida ord. |  | *2* | 8.25 (±0.07) | 8.20 | 8.30 |  | *2* | 10.55 (±2.33) | 8.90 | 12.20 |
| Stomatopoda ord. |  | *2* | 15.75 (±3.61) | 13.20 | 18.30 |  | *0* |  |  |  |
| Amphipoda ord. |  | *0* |  |  |  |  | *1* | 8.40 | 8.40 | 8.40 |
| Isopoda ord. |  | *3* | 0.43 (±0.03) | 0.40 | 0.45 |  | *0* |  |  |  |
| Euphausiacea ord. furcilia larval phase |  | *64* | 4.01 (±1.04) | 1.90 | 7.40 |  | *0* |  |  |  |
| Euphausiacea ord. (adult) |  | *1* | 8.30 | 8.30 | 8.30 |  | *8* | 15.19 (±4.71) | 9.44 | 22.59 |
| Decapoda ord. ZOEA larval phase |  | *52* | 2.98 (±0.73) | 1.20 | 4.25 |  | *6* | 2.97 (±0.89) | 2.25 | 4.60 |
| Decapoda ord. megalopa larval phase |  | *7* | 3.39 (±0.79) | 2.10 | 4.30 |  | *2* | 3.20 (±0.85) | 2.60 | 3.80 |
| Decapoda ord. late larval phase |  | *23* | 3.24 (±1.13) | 1.55 | 7.60 |  | *2* | 2.95 (±0.57) | 2.55 | 3.35 |
| *Oikopleura* spp*.* (Appendicularia) |  | *0* |  |  |  |  | *14* | 2.53 (±0.33) | 1.95 | 3.15 |
| Salps |  | *3* | 12.67 (±4.59) | 8.70 | 17.70 |  | *7* | 19.79 (±4.85) | 14.00 | 27.60 |
| Anchovy larvae (*Engraulis encrasicolus*) |  | *0* |  |  |  |  | *1* | 22.00 | 22.00 | 22.00 |
| Undefined fish eggs |  | *8* | 0.98 (±0.03) | 0.95 | 1.00 |  | *3* | 1.15 (±0.22) | 1.00 | 1.40 |
| Undefined fish larvae |  | *1* | 9.90 | 9.90 | 9.90 |  | *0* |  |  |  |
| Undefined fish |  | *0* |  |  |  |  | *3* | 95.00 (±14.80) | 85.00 | 112.00 |
| Undefined eggs (crustacean eggs, fish eggs…) |  | *38* | 0.26 (±0.04) | 0.20 | 0.40 |  | *10* | 0.43 (±0.29) | 0.20 | 0.90 |

| **g) *Prey Size (mm)* of *B. boops*** |  | ***TL* 130 - 230 mm** | | | |  | ***TL* > 230 mm** | | | |
| --- | --- | --- | --- | --- | --- | --- | --- | --- | --- | --- |
| **GROUP** |  | ***N*** | ***Avg. (± SD)*** | ***Min*** | ***Max*** |  | ***N*** | ***Avg. (± SD)*** | ***Min*** | ***Max*** |
| *Podon* sp*.* (Cladocera subord.) |  | *0* |  |  |  |  | *8* | 1.04 (±0.13) | 0.85 | 1.25 |
| *Acartia* spp*.* (Calanoida ord.) |  | *0* |  |  |  |  | *1* | 1.05 | 1.05 | 1.05 |
| *Candacia armata* (Calanoida ord.) |  | *1* | 2.55 | 2.55 | 2.55 |  | *26* | 2.97 (±0.51) | 2.10 | 4.25 |
| *Centropages* spp*.* (Calanoida ord.) |  | *1* | 2.30 | 2.30 | 2.30 |  | *126* | 2.07 (±0.23) | 1.60 | 3.25 |
| *Temora longicornis* (Calanoida ord.) |  | *0* |  |  |  |  | *7* | 1.41 (±0.34) | 1.10 | 2.10 |
| *Euchaeta* sp*.* (Calanoida ord.) |  | *0* |  |  |  |  | *1* | 3.95 | 3.95 | 3.95 |
| Calanidae fam. (Calanoida ord.) |  | *0* |  |  |  |  | *8* | 3.23 (±0.66) | 2.45 | 4.60 |
| Unidentifyable Small Calanoids (Calanoida ord.) |  | *0* |  |  |  |  | *2* | 2.18 (±0.04) | 2.15 | 2.20 |
| Other Calanoids (Calanoida ord.) |  | *1* | 1.90 | 1.90 | 1.90 |  | *2* | 2.35 (±0.99) | 1.65 | 3.05 |
| *Oithona* spp*.* (Cyclopoida ord.) |  | *0* |  |  |  |  | *1* | 2.05 | 2.05 | 2.05 |
| Cirripedia naupli |  | *1* | 0.80 | 0.80 | 0.80 |  | *1* | 0.70 | 0.70 | 0.70 |
| Cirripedia (cipris larvae) |  | *0* |  |  |  |  | *8* | 0.73 (±0.10) | 0.55 | 0.85 |
| Euphausiacea ord. calyptopis larval phase |  | *0* |  |  |  |  | *2* | 1.25 (±0.42) | 0.95 | 1.55 |
| Euphausiacea ord. (adult) |  | *0* |  |  |  |  | *3* | 11.12 (±3.12) | 8.20 | 14.40 |
| Decapoda ord. ZOEA larval phase |  | *0* |  |  |  |  | *1* | 2.65 | 2.65 | 2.65 |
| Decapoda ord. (adult) |  | *0* |  |  |  |  | *1* | 13.30 | 13.30 | 13.30 |
| Polychaeta larvae |  | *0* |  |  |  |  | *2* | 1.45 (±0.49) | 1.10 | 1.80 |
| *Muggiaea* sp*.* (Siphonophora) |  | *0* |  |  |  |  | *1* | 2.05 | 2.05 | 2.05 |
| Anthomedusae ord. (jellyfish) |  | *0* |  |  |  |  | *3* | 3.70 (±0.56) | 3.20 | 4.30 |
| Salps |  | *0* |  |  |  |  | *5* | 1.31 (±0.14) | 1.10 | 1.45 |
| Anchovy eggs (*Engraulis encrasicolus*) |  | *0* |  |  |  |  | *2* | 1.40 | 1.40 | 1.40 |
| Undefined fish eggs |  | *6* | 0.95 (±0.04) | 0.90 | 1.00 |  | *169* | 0.88 (±0.16) | 0.50 | 1.25 |
| Undefined eggs (crustacean eggs, fish eggs…) |  | *0* |  |  |  |  | *12* | 0.55 (±0.07) | 0.45 | 0.65 |
| Others |  | *0* |  |  |  |  | *1* | 4.90 | 4.90 | 4.90 |

| **h) *Prey Size (mm)* of *S. sprattus*:** |  | ***TL* < 130 mm** | | | |  | ***TL* 130 - 230 mm** | | | |
| --- | --- | --- | --- | --- | --- | --- | --- | --- | --- | --- |
| **GROUP** |  | ***N*** | ***Avg. (± SD)*** | ***Min*** | ***Max*** |  | ***N*** | ***Avg. (± SD)*** | ***Min*** | ***Max*** |
| Veliger larvae of Prosobranchia (Gastropoda) |  | *1* | 0.50 | 0.50 | 0.50 |  | *2* | 0.55 (±0.07) | 0.50 | 0.60 |
| *Podon* sp*.* (Cladocera subord.) |  | *4* | 1.09 (±0.08) | 1.00 | 1.15 |  | *4* | 1.08 (±0.09) | 0.95 | 1.15 |
| *Acartia* spp*.* (Calanoida ord.) |  | *5* | 1.08 (±0.04) | 1.05 | 1.15 |  | *3* | 1.35 (±0.13) | 1.20 | 1.45 |
| *Candacia armata* (Calanoida ord.) |  | *1* | 2.65 | 2.65 | 2.65 |  | *1* | 1.45 | 1.45 | 1.45 |
| *Centropages* spp*.* (Calanoida ord.) |  | *4* | 1.91 (±0.07) | 1.85 | 2.00 |  | *1* | 2.05 | 2.05 | 2.05 |
| *Centropages typicus* (Calanoida ord.) |  | *2* | 1.63 (±0.25) | 1.45 | 1.80 |  | *0* |  |  |  |
| *Temora longicornis* (Calanoida ord.) |  | *47* | 1.27 (±0.13) | 1.00 | 1.55 |  | *31* | 1.30 (±0.13) | 0.95 | 1.50 |
| *Temora stylifera* (Calanoida ord.) |  | *200* | 1.46 (±0.10) | 1.15 | 1.75 |  | *0* |  |  |  |
| *Euchaeta* sp.(Calanoida ord.) |  | *3* | 3.60 (±0.05) | 3.55 | 3.65 |  | *0* |  |  |  |
| Calanidae fam. (Calanoida ord.) |  | *76* | 2.72 (±0.28) | 2.10 | 3.40 |  | *1* | 1.95 | 1.95 | 1.95 |
| Unidentifyable Small Calanoids (Calanoida ord.) |  | *41* | 1.03 (±0.10) | 0.80 | 1.30 |  | *10* | 0.99 (±0.07) | 0.90 | 1.15 |
| Other Calanoids (Calanoida ord.) |  | *1* | 1.65 | 1.65 | 1.65 |  | *0* |  |  |  |
| *Oncaea* spp*.* (Cyclopoida ord.) |  | *71* | 0.56 (±0.07) | 0.40 | 0.70 |  | *33* | 0.59 (±0.05) | 0.50 | 0.70 |
| *Corycaeus anglicus* (Cyclopoida ord.) |  | *74* | 0.96 (±0.09) | 0.70 | 1.15 |  | *30* | 0.98 (±0.06) | 0.85 | 1.10 |
| *Euterpina acutifrons* (Harpacticoida ord.) |  | *1* | 0.70 | 0.70 | 0.70 |  | *0* |  |  |  |
| *Clytemnestra* spp*.* (Harpacticoida ord.) |  | *1* | 0.90 | 0.90 | 0.90 |  | *0* |  |  |  |
| Copepoda naupli |  | *1* | 0.40 | 0.40 | 0.40 |  | *0* |  |  |  |
| Juvenile copepods |  | *24* | 0.67 (±0.24) | 0.35 | 1.00 |  | *3* | 0.43 (±0.10) | 0.35 | 0.55 |
| Cirripedia naupli |  | *5* | 0.62 (±0.16) | 0.45 | 0.80 |  | *0* |  |  |  |
| Euphausiacea ord. furcilia larval phase |  | *2* | 2.10 (±0.49) | 1.75 | 2.45 |  | *0* |  |  |  |
| Decapoda ord. ZOEA larval phase |  | *19* | 1.95 (±0.33) | 1.40 | 2.55 |  | *1* | 2.30 | 2.30 | 2.30 |
| Anchovy eggs (*Engraulis encrasicolus*) |  | *28* | 1.49 (±0.07) | 1.35 | 1.65 |  | *24* | 1.45 (±0.10) | 1.15 | 1.60 |
| Undefined fish eggs |  | *2* | 0.98 (±0.04) | 0.95 | 1.00 |  | *9* | 0.91 (±0.08) | 0.80 | 1.05 |
| Undefined eggs (crustacean eggs, fish eggs…) |  | *1* | 0.30 | 0.30 | 0.30 |  | *0* |  |  |  |
| Others |  | *2* | 4.93 (±0.04) | 4.90 | 4.95 |  | *0* |  |  |  |
